# Supplementary material for: Cardiomyocyte ryanodine receptor degradation by chaperone-mediated autophagy
Source: Oxford University Press journal article supplement (doi:10.1093/cvr/cvt029), 2013-02-11
Supplement: cvt029_Supplementary_Data.zip [file cvt029_Supplementary_Data.zip]

Archive with 1 entries (1 files):
- cvt029supp.pdf
