# Supplementary material for: Cardiomyocyte ryanodine receptor degradation by chaperone-mediated autophagy
Source: Oxford University Press journal article supplement (doi:10.1093/cvr/cvt029), 2013-02-11

### **Supplementary figure legends**

**Supplementary Figure 1** Geldanamycin (GA) induces ROS generation in cultured cardiomyocytes. ROS measured by flow cytometry as described in Methods after 2 h incubation with GA in presence or absent of N-acetylcysteine (NAC). Values are mean  $\pm$  SEM (n=5-6). \* $P$ <0.05 GA vs. control.

**Supplementary Figure 2** Chaperone-mediated autophagy is not necessary for RyR2 degradation during simulated ischemia/reperfusion. Cardiomyocytes transfected with siRNA for LAMP-2A were exposed to si/R. Densitometry analysis shows the ratio of RyR2/ $\beta$ -actin measured by Western blot obtained after si/R. Values are mean  $\pm$  SEM (n=4). \* $P$ <0.05 si/R siSRC or si/R siLAMP-2A vs. siSCR.

Supplementary Figure 1

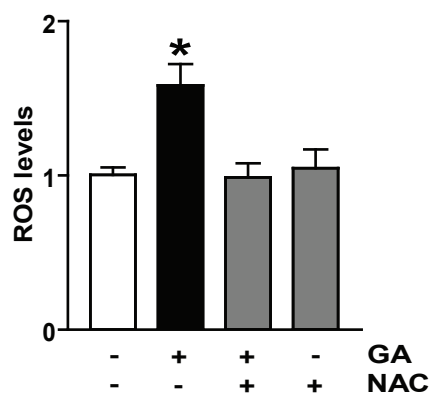

Supplementary Figure 2

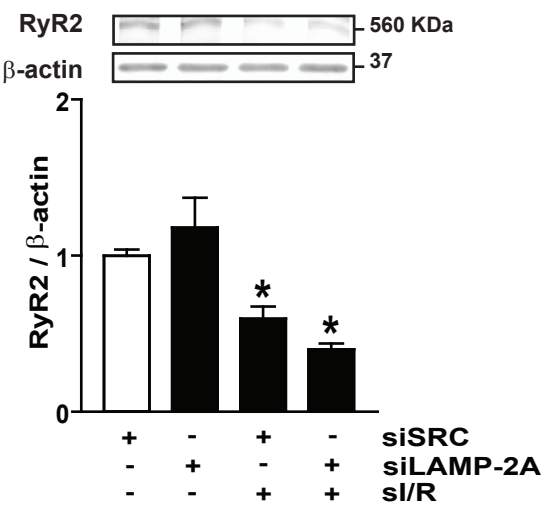

Supplement: cvt029_Supplementary_Data.zip [file cvt029_Supplementary_Data.zip › cvt029supp.pdf]
